# Supplementary material for: One-pot green solid-state synthesis of Cu2O/microcrystalline cellulose composite with high anti-pathogenic activity
Source: Research Square preprint supplement (doi:10.21203/rs.3.rs-3361171/v1), 2023-09-22
Supplement: Supplementary file 1 [file 0ef8140fa1910d9e8c628360.docx]

**Supplementary Materials**

# One-pot green solid-state synthesis of Cu2O/microcrystalline cellulose composite with high anti-pathogenic activity

Ke Sun1, Han Hu1, Zirong He1, Zhuojun Xiao1, Xiaoqian Jin1, Chen Zheng1 & Yi Liu*1,2

1Materials Genome Institute, Shanghai University, Shanghai 200444, China

2Zhejiang Laboratory, Hangzhou 311100, China

*Corresponding author. E-mail address: yiliu@shu.edu.cn (Y. L.)


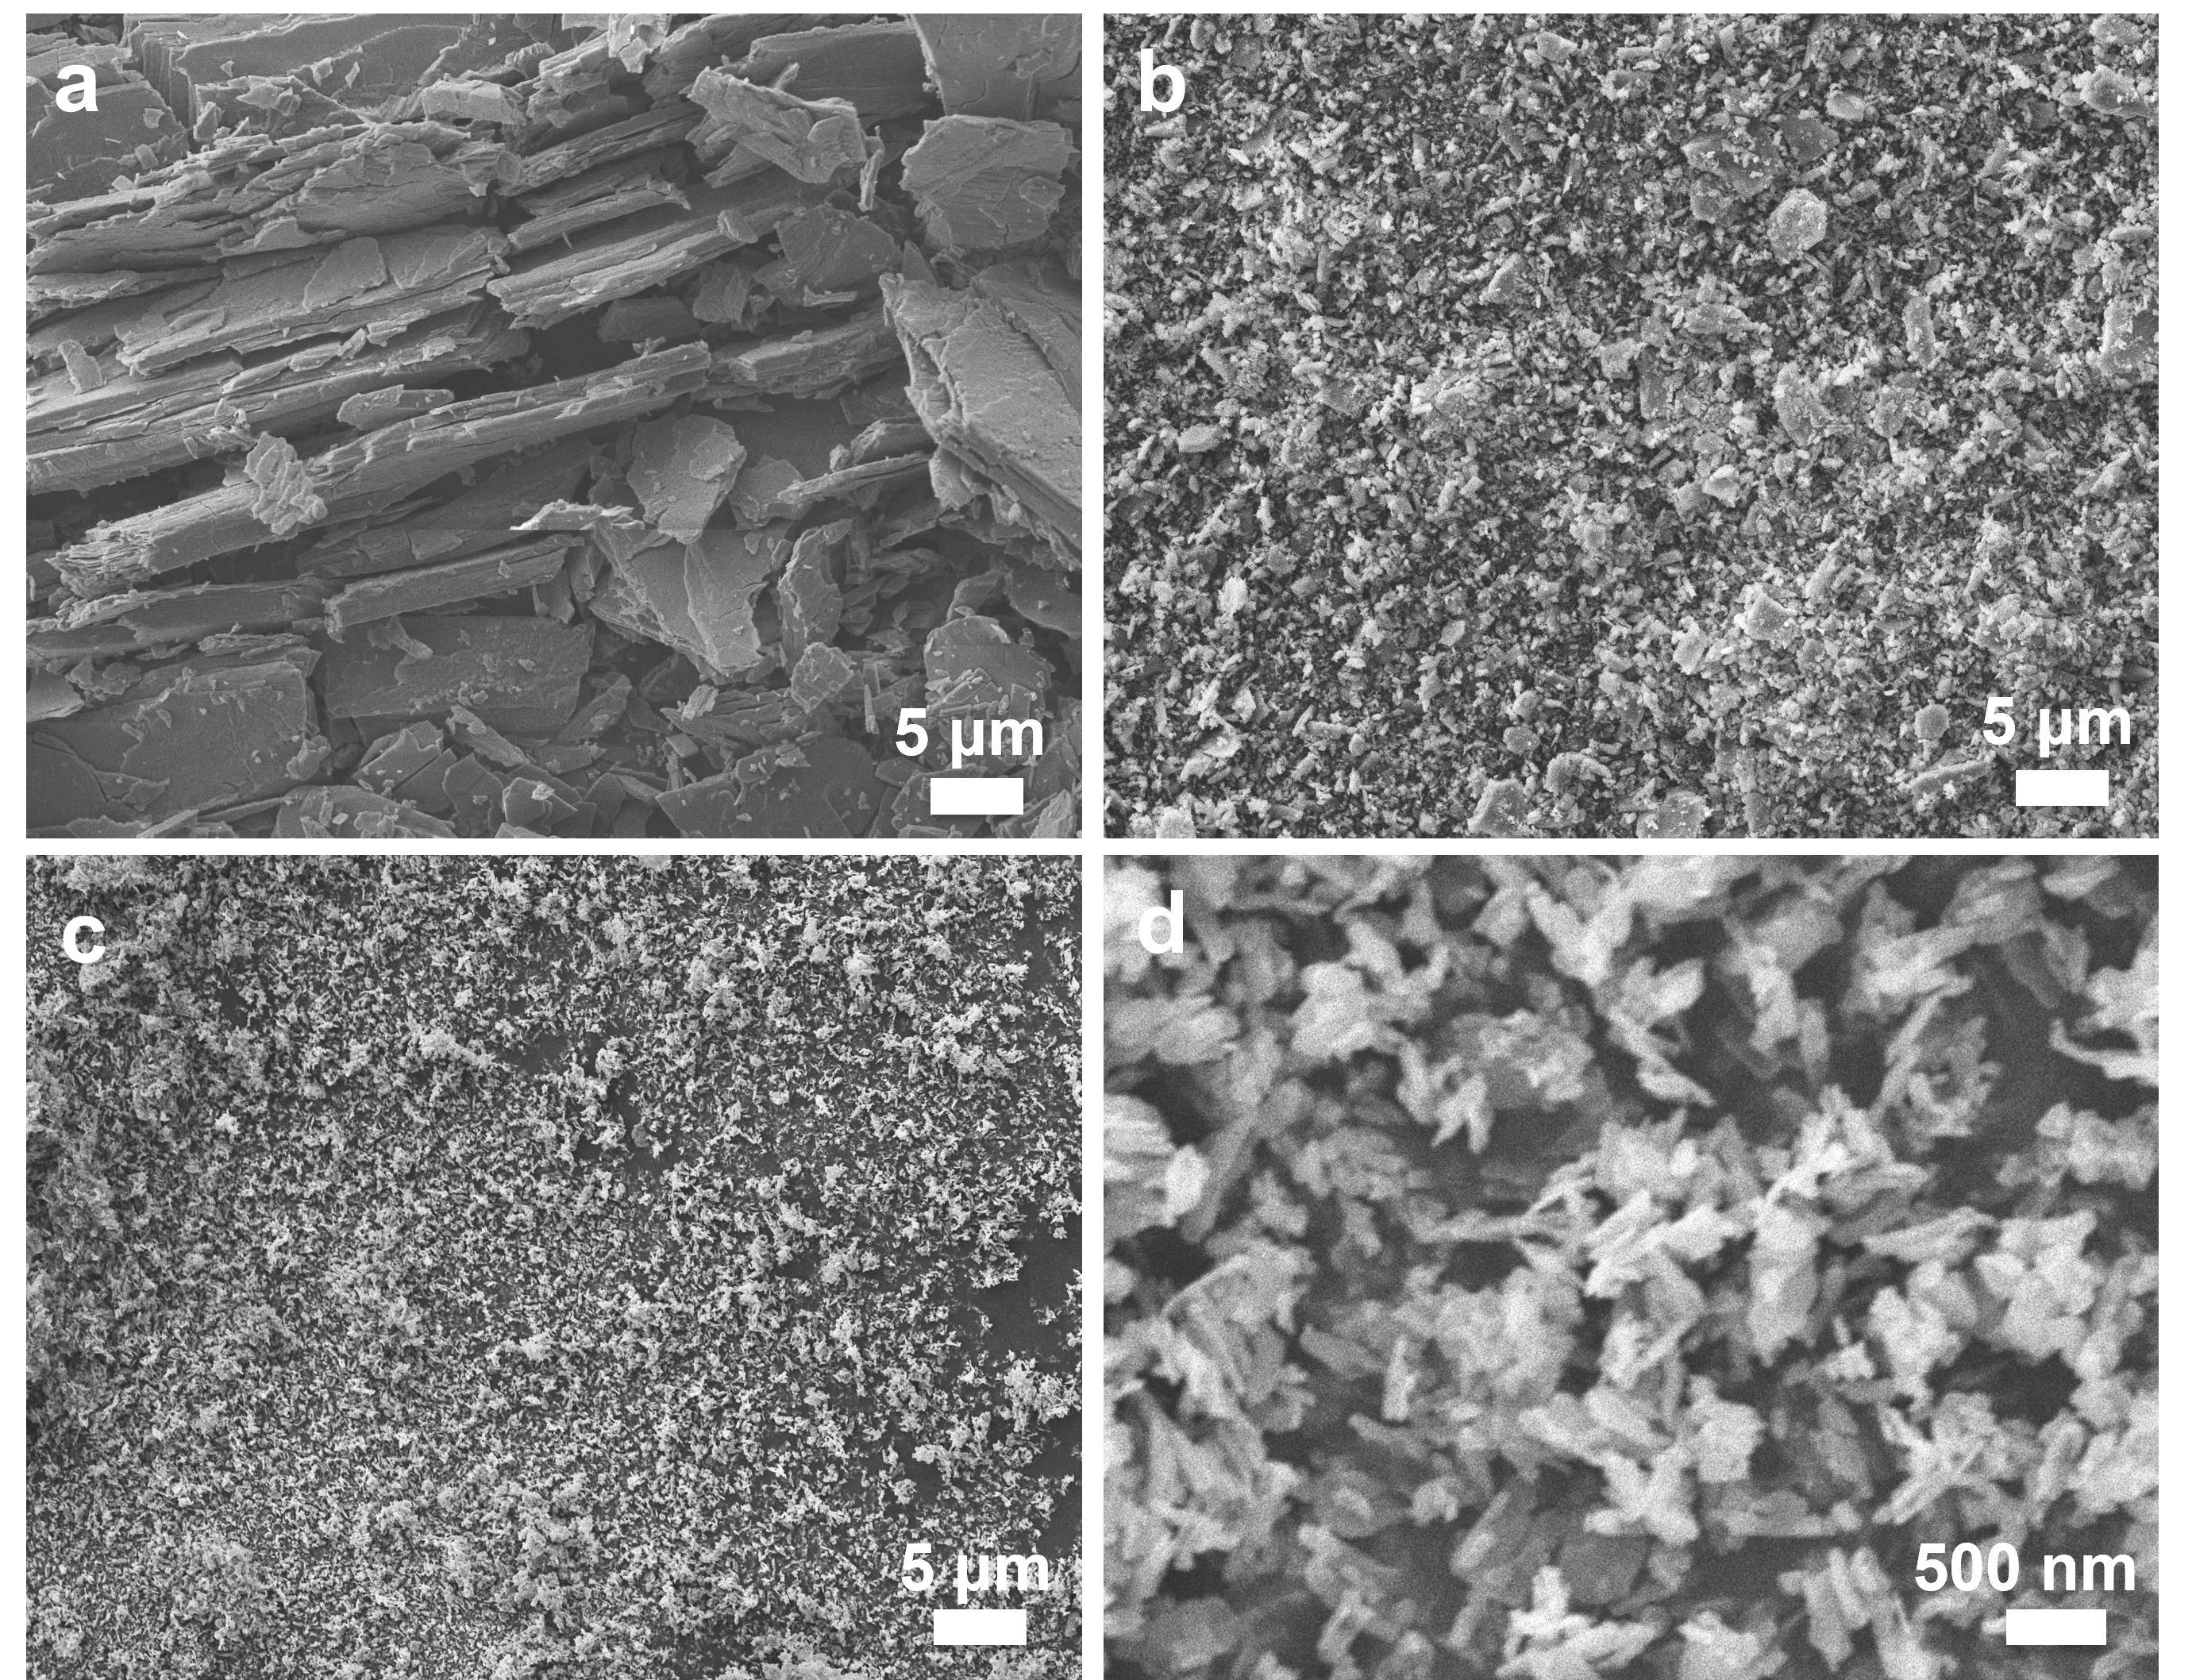


**Supplementary Fig. 1.** SEM images of copper formate. **a** Untreated sample; **b** after BM-Ⅰ for 6 h; **c, d** after BM-Ⅰ for 12 h.





Supplementary Fig. 2. XRD spectra ofcopper formate. **a** untreated sample and **b** after BM-Ⅰ for 12 h.

**Supplementary Table 1.** The ratio of Cu+ and Cu2+ on the surface of the Cu2O/MCC composite. The results were determined by the fitted peaks area ratio of the XPS Cu2p3/2 spectrum.

| **Sample** | **Cu****+ ratio (%)** | **Cu2+ ratio (%)** |
| --- | --- | --- |
| Cu2O/MCC composite | 93.8 | 6.2 |

**Supplementary Table 2.** Mass ratio of Cu and Cu2O for the Cu2O/MCC composite. The results were determined by ICP-OES. a: Ignoring the trace amount of CuO, the mass ratio of Cu2O was calculated according to the mass ratio of Cu element (88.82 %) relative to Cu2O.

| **Sample** | **Cu atomic mass ratio**  **(wt. %)** | **a** **Cu2O mass ratio**  **(wt. %)** |
| --- | --- | --- |
| Cu2O/MCC composite | 17.09 | 19.24 |





**Supplementary Fig. 3.** Particle size distribution histogram of Cu2O for the Cu2O/MCC composite. The result is based on three SEM images of the Cu2O/MCC composite, 100 Cu2O particles in the SEM images were analyzed for statistics.





**Supplementary Fig. 4.** XRD spectra of the sintered product of **a** untreated copper formate, **b** Cu powders (particle size: 200 nm, commercial purchase), and **c** copper formate/MCC powders.

Experimental conditions: 200 mg of untreated copper formate powders, Cu powders, and pre-prepared copper formate/MCC powders were separately added to three alumina ceramic crucibles and then placed into the isothermal region of box-type resistance furnace. The furnace was heated to 230 ℃ by the heating rate of 5 ℃/min and sintered at 230 °C for 12 min in air atmosphere. After air cooling to room temperature the sintered product was obtained.





**Supplementary Fig. 5.** The C1s XPS spectra of MCC and the Cu2O/MCC composite.

**Supplementary Table 3.** Relative energy differences calculated by DFT between the original cellobiose unit and that after deprotonation of hydroxyl groups at C2, C3, and C6 positions, respectively. E is the total energy of the cellobiose unit after deprotonation and E0 is the total energy of the cellobiose unit.

| **Deprotonation site** | **Total energy (kcal/mol)** | **E-E0 (kcal/mol)** |
| --- | --- | --- |
| none | -863489.92 | 0 |
| C2-OH | -863070.30 | 419.62 (5.03) |
| C3-OH | -863070.57 | 419.35 (4.76) |
| C6-OH | -863075.33 | 414.59 (0.00) |


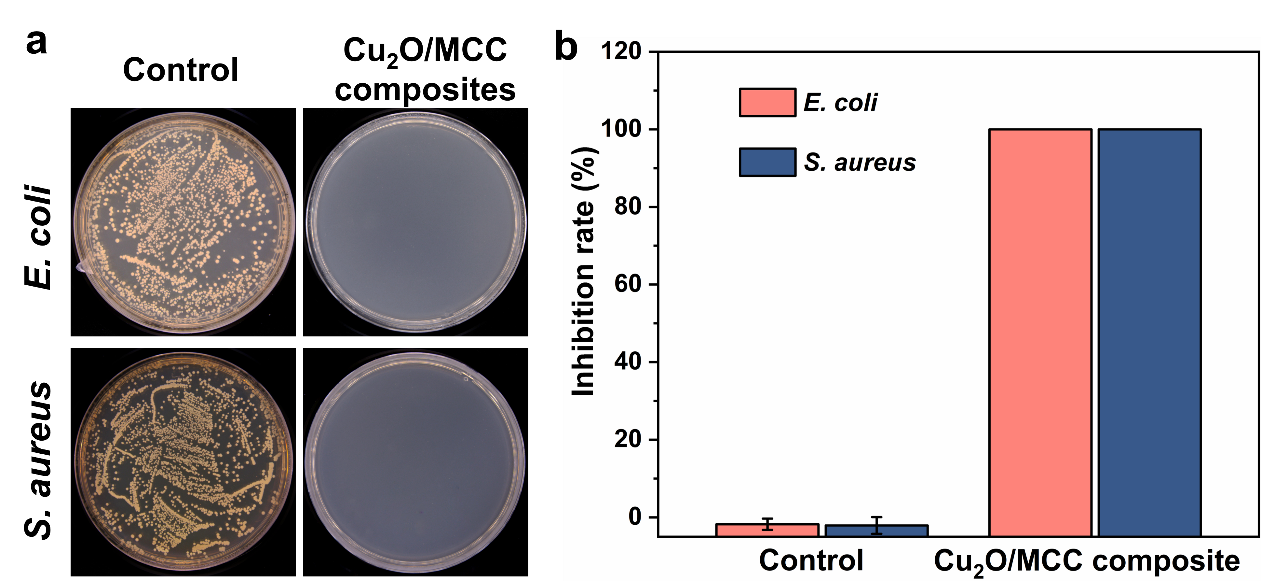


**Supplementary Fig. 6. a** Images of antibacterial experiments for the Cu2O/MCC composite against *E. coli* and *S. aureus.* **b** The Inhibition rates for *E. coli* and *S. aureus*. Error bars indicated the standard deviations among three repeated experiments.





**Supplementary Fig. 7.** Evolution of XRD spectra of the Cu2O/MCC composite as function of time in the structure stability tests at humid and high-ambient temperature conditions (35 ℃ and 85 % relative humidity) up to 60 days.
